# Supplementary material
Source: publisher site journal article supplement (https://neobiota.pensoft.net/article/30392/download/suppl/33/)

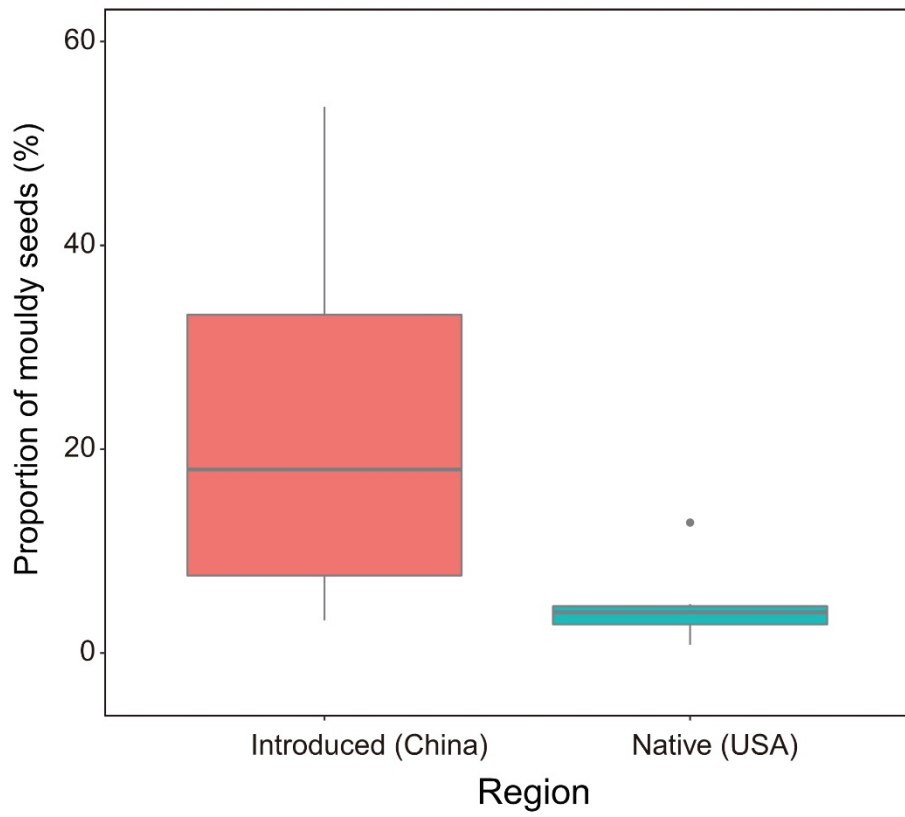

Fig. S2 Proportion of moldy seeds in introduced (red) and native (blue) populations of *P. virginica*.

Supplement: Supplementary file 1
